# Supplementary material for: Harmonising the land-use flux estimates of global models and national inventories for 2000–2020
Source: Copernicus journal article supplement (doi:10.5194/essd-15-1093-2023), 2023-03-10
Supplement: Supplementary file 1 [file essd-15-1093-2023-supplement.pdf]

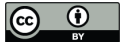

*Supplement of*

## **Harmonising the land-use flux estimates of global models and national inventories for 2000–2020**

**Giacomo Grassi et al.**

*Correspondence to:* Giacomo Grassi ([giacomo.grassi@ec.europa.eu](mailto:giacomo.grassi@ec.europa.eu))

The copyright of individual parts of the supplement might differ from the article licence.

**Table S1.** Key data on forest area and LULUCF fluxes for the 42 countries having a non-intact (managed) forest area greater than 10 Million ha in both our study and National GHG inventories (NGHGs). The data includes the area of non-intact (managed) forest and the CO<sub>2</sub> fluxes (Mt CO<sub>2</sub> yr<sup>-1</sup>, 2000-2020 average) from bookkeeping models (BMs), Dynamic Global Vegetation Models (DGVMs), and NGHGs for LULUCF, forest land, deforestation, and other fluxes. The countries listed represent nearly 90% of the global area of non-intact (managed) forest. BM values are averages of three models and DGVM values are averages of 16 models, consistent with the Global Carbon Budget 2022 (Friedlingstein et al., 2022). Results for all countries, including the yearly values of CO<sub>2</sub> fluxes, are available in the online repository (Grassi et al. 2023).

|                               | Areas of managed forest (Mha, around 2015) |                           | C fluxes (Mt CO <sub>2</sub> yr <sup>-1</sup> , average 2000-2020) |       |             |        |       |       |             |               |       |                              |       |  |
|-------------------------------|--------------------------------------------|---------------------------|--------------------------------------------------------------------|-------|-------------|--------|-------|-------|-------------|---------------|-------|------------------------------|-------|--|
|                               |                                            |                           | LULUCF (sum of all categories)                                     |       |             | FOREST |       |       |             | DEFORESTATION |       | Other land uses + org. soils |       |  |
|                               | Used in this study (1)                     | Based on country data (2) | BMs                                                                | NGHGs | BMs + DGVMs | BMs    | DGVMs | NGHGs | BMs + DGVMs | BMs           | NGHGs | BMs                          | NGHGs |  |
| Angola                        | 71                                         | 53                        | 104                                                                | 55    | -104        | -11    | -208  | 2     | -219        | 102           | 52    | 13                           | 0     |  |
| Argentina                     | 37                                         | 49                        | 130                                                                | 74    | 76          | -3     | -54   | -11   | -57         | 101           | 79    | 32                           | 5     |  |
| Australia (3)                 | 44                                         | 144                       | 71                                                                 | 14    | 16          | -6     | -55   | -53   | -61         | 43            | 65    | 35                           | 1     |  |
| Bolivia                       | 46                                         | 53                        | 75                                                                 | 38    | -7          | -21    | -82   | 15    | -103        | 90            | 24    | 6                            | -1    |  |
| Brazil                        | 338                                        | 338                       | 1344                                                               | 771   | 844         | -76    | -499  | -356  | -576        | 1331          | 1120  | 89                           | 8     |  |
| Cameroon                      | 34                                         | 20                        | 31                                                                 | -77   | -43         | -39    | -74   | -108  | -113        | 67            | 21    | 3                            | 10    |  |
| Canada                        | 283                                        | 283                       | 111                                                                | -20   | -302        | 43     | -413  | -7    | -370        | 51            | 7     | 17                           | -20   |  |
| Central African Republic      | 55                                         | 20                        | 9                                                                  | -229  | -107        | -15    | -116  | -333  | -130        | 24            | 104   | -1                           | 0     |  |
| Chile                         | 12                                         | 18                        | 12                                                                 | -68   | 1           | 6      | -11   | -71   | -5          | 9             | 3     | -3                           | 1     |  |
| China                         | 173                                        | 214                       | 3                                                                  | -943  | -320        | -331   | -324  | -790  | -655        | 223           | 0     | 111                          | -153  |  |
| Colombia                      | 45                                         | 28                        | 68                                                                 | 86    | -36         | -86    | -104  | 32    | -190        | 149           | 54    | 5                            | 0     |  |
| Congo                         | 20                                         | 24                        | 14                                                                 | -21   | -42         | -12    | -56   | -24   | -68         | 24            | 3     | 2                            | 0     |  |
| Cote d'Ivoire                 | 20                                         | 3                         | 70                                                                 | 28    | 19          | -61    | -50   | -13   | -111        | 128           | 41    | 3                            | 0     |  |
| Dem. Rep Congo                | 154                                        | 156                       | 416                                                                | 271   | -16         | -224   | -432  | -292  | -656        | 626           | 563   | 13                           | 0     |  |
| Ethiopia                      | 19                                         | 17                        | 81                                                                 | 62    | 27          | -13    | -54   | -87   | -67         | 45            | 149   | 49                           | 0     |  |
| Finland                       | 20                                         | 22                        | 11                                                                 | -22   | -15         | 6      | -26   | -41   | -20         | 3             | 3     | 2                            | 15    |  |
| France                        | 17                                         | 24                        | -30                                                                | -39   | -62         | -22    | -32   | -55   | -54         | -14           | 11    | 6                            | 5     |  |
| Gabon                         | 19                                         | 18                        | 8                                                                  | -110  | -36         | -7     | -44   | -118  | -51         | 14            | 8     | 1                            | 0     |  |
| Germany                       | 13                                         | 11                        | -36                                                                | -14   | -64         | -25    | -28   | -61   | -53         | -16           | 1     | 5                            | 45    |  |
| India                         | 38                                         | 71                        | 64                                                                 | -255  | -16         | -101   | -80   | -71   | -181        | 131           | 0     | 35                           | -184  |  |
| Indonesia                     | 110                                        | 121                       | 986                                                                | 535   | 654         | -427   | -331  | -401  | -758        | 1004          | 347   | 408                          | 589   |  |
| Japan                         | 23                                         | 25                        | -23                                                                | -71   | -66         | -32    | -43   | -77   | -75         | 4             | 2     | 6                            | 4     |  |
| Lao People's Dem Rep          | 19                                         | 23                        | 39                                                                 | 35    | -10         | -21    | -49   | -6    | -69         | 58            | 42    | 2                            | 0     |  |
| Madagascar                    | 17                                         | 9                         | 42                                                                 | 34    | 0           | -54    | -41   |       | -95         | 88            | 34    | 7                            | 0     |  |
| Malaysia                      | 23                                         | 18                        | 99                                                                 | -225  | 23          | -60    | -76   | -248  | -137        | 112           | 23    | 47                           | 0     |  |
| Mexico                        | 53                                         | 97                        | 63                                                                 | -180  | -50         | -53    | -112  | -196  | -165        | 107           | 16    | 9                            | 0     |  |
| Mozambique                    | 43                                         | 34                        | 48                                                                 | 39    | -31         | -11    | -78   |       | -89         | 46            | 39    | 13                           | 0     |  |
| Myanmar                       | 37                                         | 40                        | 133                                                                | 50    | 36          | -133   | -97   | -3    | -230        | 255           | 54    | 11                           | 0     |  |
| Nigeria                       | 15                                         | 14                        | 49                                                                 | 287   | 12          | -36    | -37   | -5    | -73         | 83            | 292   | 2                            | 0     |  |
| Norway                        | 10                                         | 12                        | 2                                                                  | -21   | -13         | 0      | -14   | -26   | -15         | 2             | 5     | 0                            | 1     |  |
| Papua New Guinea              | 27                                         | 9                         | 34                                                                 | -9    | -46         | -18    | -80   | -19   | -98         | 33            | 8     | 19                           | 2     |  |
| Peru                          | 25                                         | 18                        | 58                                                                 | 94    | -10         | -35    | -68   | 16    | -103        | 85            | 79    | 8                            | 0     |  |
| Russian Federation            | 666                                        | 686                       | -63                                                                | -628  | -1012       | -164   | -949  | -675  | -1113       | 109           | 6     | -8                           | 41    |  |
| Spain                         | 12                                         | 16                        | -15                                                                | -38   | -32         | -10    | -17   | -37   | -27         | 0             | 1     | -6                           | -1    |  |
| Sudan                         | 24                                         | 7                         | 10                                                                 | 3     | -26         | 0      | -36   | 0     | -36         | 2             | 3     | 8                            | 0     |  |
| Sweden                        | 25                                         | 28                        | 11                                                                 | -41   | -28         | 9      | -39   | -53   | -30         | 2             | 3     | 0                            | 10    |  |
| Thailand                      | 19                                         | 17                        | 52                                                                 | -16   | 7           | -38    | -45   | -32   | -83         | 81            | 15    | 8                            | 0     |  |
| Turkey                        | 11                                         | 23                        | -11                                                                | -77   | -44         | -9     | -32   | -79   | -41         | 5             | 1     | -7                           | 0     |  |
| Ukraine                       | 12                                         | 11                        | -1                                                                 | 1     | -14         | -12    | -12   | -31   | -24         | 8             | 1     | 3                            | 31    |  |
| United Rep of Tanzania        | 40                                         | 48                        | 148                                                                | 77    | 59          | -32    | -90   | 0     | -121        | 143           | 77    | 37                           | 0     |  |
| United States of America      | 247                                        | 282                       | -112                                                               | -818  | -598        | -173   | -486  | -781  | -659        | 83            | 125   | -22                          | -161  |  |
| Viet Nam                      | 16                                         | 15                        | 97                                                                 | -39   | 60          | -66    | -37   | -55   | -103        | 131           | 16    | 32                           | -1    |  |
| Zambia                        | 37                                         | 48                        | 51                                                                 | 39    | -60         | -4     | -110  | -71   | -115        | 40            | 109   | 15                           | 0     |  |
| <i>Sum of countries above</i> | 2969                                       | 3166                      | 4249                                                               | -1367 | -1376       | -2375  | -5625 | -5220 | -8000       | 5610          | 3605  | 1014                         | 248   |  |
| <i>Rest of countries</i>      | 358                                        | 525                       | 557                                                                | -564  | -250        | -823   | -807  | -1439 | -1630       | 1154          | 749   | 225                          | 127   |  |
| <b>World</b>                  | 3327                                       | 3691                      | 4806                                                               | -1932 | -1626       | -3197  | -6432 | -6660 | -9630       | 6764          | 4354  | 1239                         | 374   |  |
| Annex I                       | 1474                                       | 1670                      | -233                                                               | -1981 | -2509       | -571   | -2276 | -2292 | -2847       | 310           | 249   | 28                           | 62    |  |
| Non Annex I                   | 1853                                       | 2021                      | 5039                                                               | 49    | 882         | -2627  | -4157 | -4368 | -6783       | 6454          | 4105  | 1211                         | 312   |  |
| Developed Countries           | 802                                        | 968                       | -205                                                               | -1413 | -1517       | -414   | -1312 | -1645 | -1725       | 200           | 249   | 9                            | -17   |  |
| E. Europe and W.-C. Asia      | 686                                        | 727                       | -40                                                                | -675  | -1041       | -191   | -1001 | -770  | -1192       | 123           | 10    | 29                           | 84    |  |
| Asia and developing Pacific   | 510                                        | 592                       | 1635                                                               | -939  | 391         | -1390  | -1243 | -1781 | -2634       | 2312          | 585   | 713                          | 256   |  |
| Africa and Middle East        | 662                                        | 682                       | 1434                                                               | 242   | -248        | -676   | -1682 | -1664 | -2358       | 1795          | 1870  | 314                          | 36    |  |
| Latin Amer. and Caribbean     | 667                                        | 722                       | 1983                                                               | 854   | 788         | -526   | -1194 | -800  | -1720       | 2334          | 1639  | 175                          | 14    |  |

(1) Based on non-intact forest map (Potapov et al. 2017) and Hansen et al. (2013), except for Canada and Brazil, where the country maps of managed forest were used (see Figure S1). For Russia, the tree cover thresholds of Hansen were adjusted to match better the regional distribution of managed forest (see Figure S2).

(2) Based on Grassi et al. (2022), using information on the area of managed forest from country reports to UNFCCC, gap-filled with information on the area of secondary forest and plantations from country reports to FAO-FRA 2020. Gap-filling was applied to about 2% of total forest area.

(3) A large part of the forest area reported as managed in the NGHGI (about 120 Mha of 'other native forests') is assumed to be in carbon equilibrium.

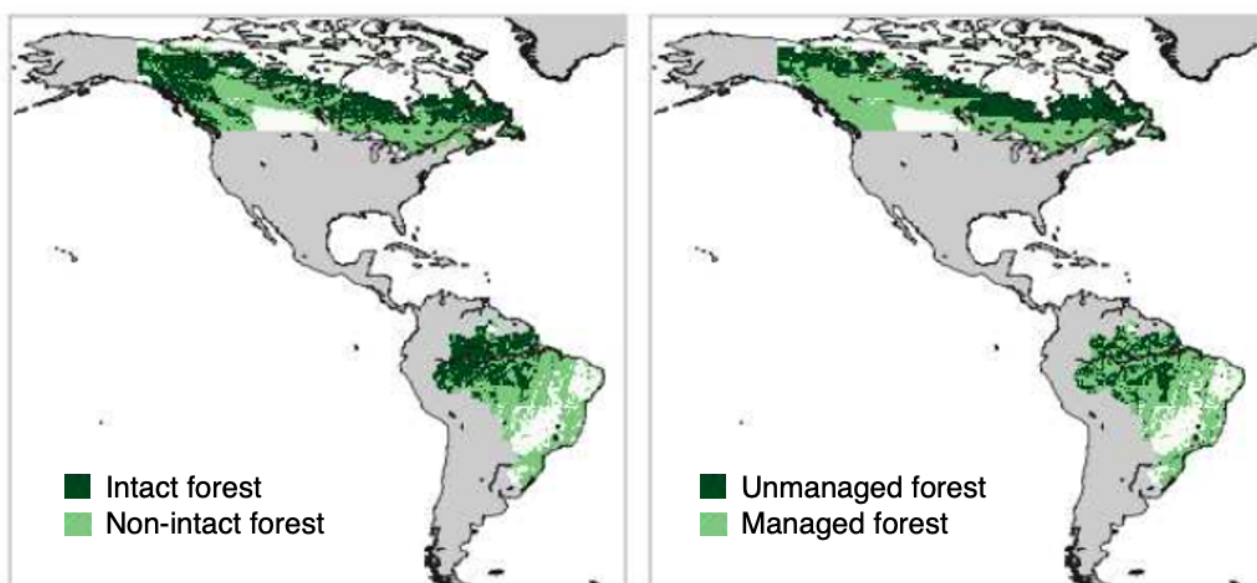

**Figure S1.** Difference between intact/non-intact forest (dark/light green, left panel) and unmanaged/managed forest (dark/light green, right panel) for Canada and Brazil. The intact/non-intact map is from Potapov et al. (2017), the managed/unmanaged map is from the NGHGIs of Canada (Canada, 2022) and Brazil (Brazil, 2020).

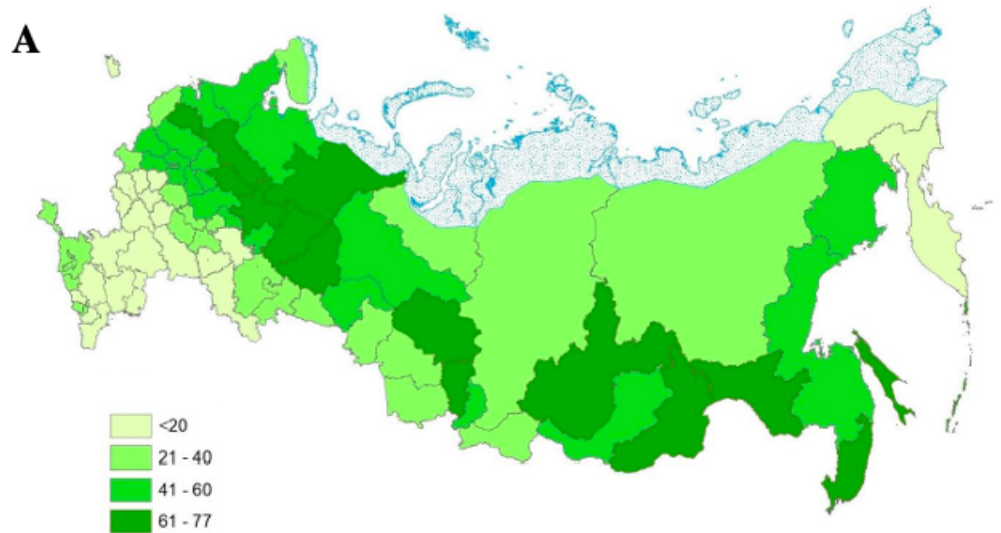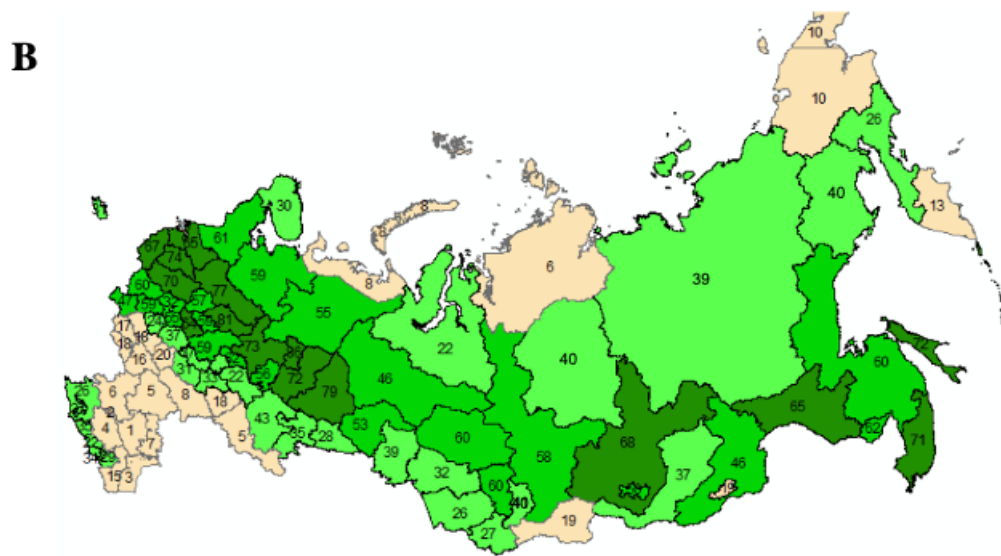

**Figure S2.** A: Share of managed forest lands in each region of the Russian Federation (relative to the total area), from the Russian NGHGI (Russian Federation, 2022). B: Share of non-intact forest in each region, as used in our study and obtained by adjusting the tree cover threshold in Hansen et al. (2013) to allow a better match with the distribution of managed forest in the Russian NGHGIs. At national level, the area of managed forest in the Russian NGHGI is 686 Mha. In our study, the area of non-intact forest is 666 Mha.

## References:

- Brazil: National Communication 3, <https://unfccc.int/documents/66129> , 2020 (last access: 20 December 2022).
- Canada: National Inventory Report (NIR), <https://unfccc.int/documents/461919> , 2022 (last access: 20 December 2022).
- Friedlingstein, et al.: Global Carbon Budget 2022, *Earth Syst. Sci. Data*, 14, 4811–4900, 2022.
- Grassi, G., Conchedda, G., Federici, S., Korosuo, A., Melo, J., Rossi, S., Sandker, M., Somogyi, Z., and Tubiello, F. N.: Carbon fluxes from land 2000-2020: bringing clarity on countries' reporting, *Earth Syst. Sci. Data*, 14, 4643–4666, 2022.
- Grassi, G., Schwingshackl, C., Thomas Gasser, T., Houghton, R.A. Sitch, S., Canadell, J.G., Cescatti, A. Ciais, P., Federici, S., Friedlingstein, P., Kurz, W.A., Sanz Sanchez, M.J., Abad Viñas, R. Alkama, R., Bultan, S., Ceccherini, G., Falk, S., Kato, E., Kennedy, D., Knauer, J., Korosuo, A., Melo, J., McGrath, M.J., Nabel, J.E.M.S., Poulter, B., Romanovskaya, A., Rossi, S., Tian, H., Walker, A.P., Yuan, W., Yue, X., Pongratz, J. Harmonising the land-use flux estimates of global models and national inventories for 2000-2020: background data. <https://doi.org/10.5281/zenodo.7650360>. 2023.
- Hansen, M. C., Potapov, P. V, Moore, R., Hancher, M., Turubanova, S. A., Tyukavina, A., Thau, D., Stehman, S. V, Goetz, S. J., Loveland, T. R., Kommareddy, A., Egorov, A., Chini, L., Justice, C. O., and Townshend, J. R. G.: High-Resolution Global Maps of 21st-Century Forest Cover Change, *Science* 342, 850–853, 2013.
- Potapov, P., Hansen, M. C., Laestadius, L., Turubanova, S., Yaroshenko, A., Thies, C., Smith, W., Zhuravleva, I., Komarova, A., Minnemeyer, S., and Esipova, E.: The last frontiers of wilderness: Tracking loss of intact forest landscapes from 2000 to 2013, *Sci. Adv.*, 3, 1–14, <https://doi.org/10.1126/sciadv.1600821>, 2017.
- Russian Federation: National Inventory Report (NIR), <https://unfccc.int/documents/461970> (last access: 20 December 2022), 2022.
